# Supplementary material
Source: HighWire-hosted journal article supplement (https://www.annfammed.org/highwire/filestream/8129/field_highwire_adjunct_files/0/203supp.pdf)
Supplement: 203supp.pdf [file 203supp.pdf]

Online Supplementary Material

Smith M, French L, Barry HC. Periodic Abstinence from Pap (PAP) Smear Study: women's perceptions of Pap smear screening. *Ann Fam Med* 2003;1:203-208.

<http://www.annfammed.org/cgi/content/full/1/4/203>

---

**SUPPLEMENTAL APPENDIX**

We used the following questions to guide the focus group interviews.

1. What are your thoughts about how to stay healthy?
  - What is included? (Prompts: doctor's visits, and regular health maintenance and screening tests)
  - What influences your beliefs? (Prompts: family, friends, physicians, media, experience, such as critical events that changed your thinking)
  - Do you personally participate in health screening? (Prompts: why or why not)
2. What are your thoughts about Pap smears?
  - Are they effective? (Prompts: reduction in mortality or morbidity from cervical cancer, identification of other diseases vs low incidence of disease, other priorities)
  - Do you believe that there are other advantages for women in completing Pap smears? (Prompts: opportunity to discuss health topics, patient reassurance, provision of birth control or other health promotion services)
  - Do you believe that there are disadvantages or problems with doing Pap smears?
  - What women should get Pap smears? (Prompts: risk factors, age, income considered, posthysterectomy, other illnesses or comorbidities, psychosocial factors, other priorities)
3. How often do you think that a woman should have a Pap smears? (Prompts: does the recommendation change with risk status, age, race, income, insurance)
4. What helps women get a Pap smear? (Prompts: annual examination scheduled, patient request, office staff, reminders, reimbursement)
5. What prevents women from getting Pap smears? (Prompts: embarrassment, dislike, discomfort, fear, forgets, age, knowledge, beliefs in value of test or provider's ability, time, socioeconomic status, cost, insurance, transportation)
  - What do you think is the most important barrier(s)?
6. What is your opinion about getting Pap smears less than once a year (every 3 years if a woman is at low risk, not at all for women older than age 65 years or posthysterectomy)?
7. How should the idea of getting Pap smears less than once a year for low-risk women be presented to them and to women in general?
